# Supplementary material
Source: PubMed Central journal article supplement (PMC2664855)
Supplement: NIHMS93433-supplement-s.pdf [file NIHMS93433-supplement-s.pdf]

Plotnikov et al, Impaired turnover of prolactin receptor contributes to transformation of human breast cells

## **Supplementary Data**

### **Legends to supplementary figures**

**Figure 1S:** Degradation of Flag-tagged PRLr-WT or PRLr-S349A mutant in MCF10A $\Delta$ p53 cells was analyzed by cycloheximide chase followed by immunoblotting using anti-Flag antibody (upper panel). Analysis of  $\beta$ -actin levels was used as a loading control (lower panel).

**Figure 2S:** Representative morphology of indicated MCF10A $\Delta$ p53 cell lines growth in three-dimensional cultures at the indicated day after plating. Scale bar - 15 $\mu$ M.

**Figure 3S:** Pictures of H&E stained histological slides were taken at 8 day after indicated MCF10A $\Delta$ p53 cells injection into the NCRNU-M mice. The pictures were taken using the indicated microscope objectives.

**Figure 4S:** Effect of anadamide on the growth of T47D cells. The graph represents the number of live cells calculated with trypan blue  $\pm$  SE at indicated times after the treatment. The differences between groups were statistical significant ( $pV < 0.05$ ) at all indicated times.

**Figure 5S:** Effect of anandamide on S349-PRLr phosphorylation in -MCF10A $\Delta$ p53 cells. MCF10A $\Delta$ p53 cells expressing flag-tagged PRLr-WT were pretreated with 20mM of methylamine for 2 hours, and then with 10 $\mu$ M of anandamide for indicated

times. The lysates immunoprecipitated with anti-flag M2 agarose, separated on SDS-PAGE and analyzed by immunoblotting with antibodies against pSer349-PRLr, upper panel; and Flag, bottom panel.

**Figure 6S:** Degradation of Flag-tagged PRLr-WT in MCF10A $\Delta$ p53 cells after anandamide treatment was analyzed by cycloheximide chase followed by immunoblotting using anti-Flag antibody (upper panel). Analysis of  $\beta$ -actin levels was used as a loading control (lower panel).

**Figure 7S:** Photos of the tumors derived from the indicated T47D cells at 32 day after cell injection either into animal flank or into the abdominal mammary glands as indicated.
